# Supplementary material
Source: PubMed Central journal article supplement (PMC4761527)

**(A)** ECG Peaks Detected (Simulation Test)

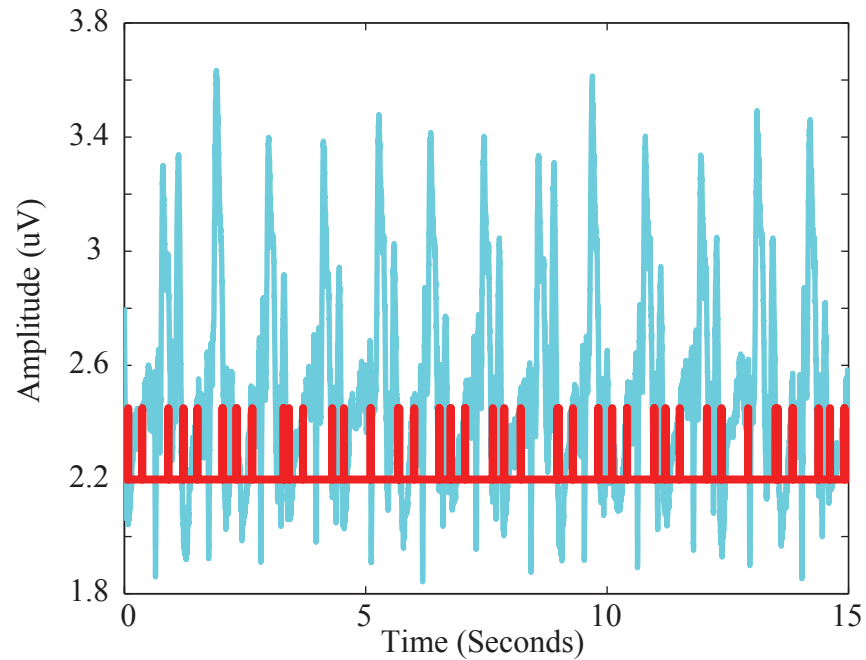

**(B)** Mean +/- SD of Time-Locked ECG (Simulation Test)

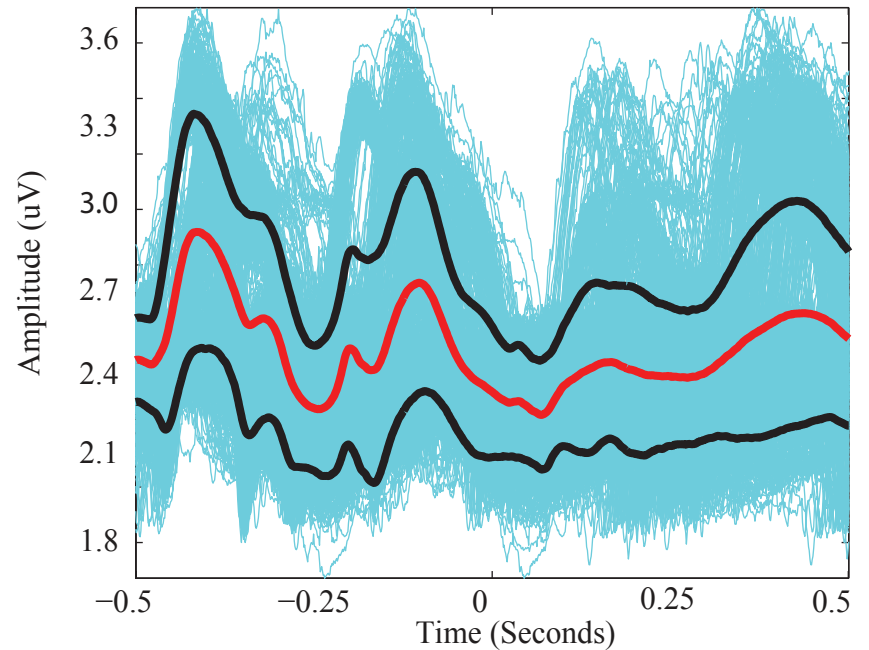

**(C)** ECG Peaks Detected (Visual Evoked Test)

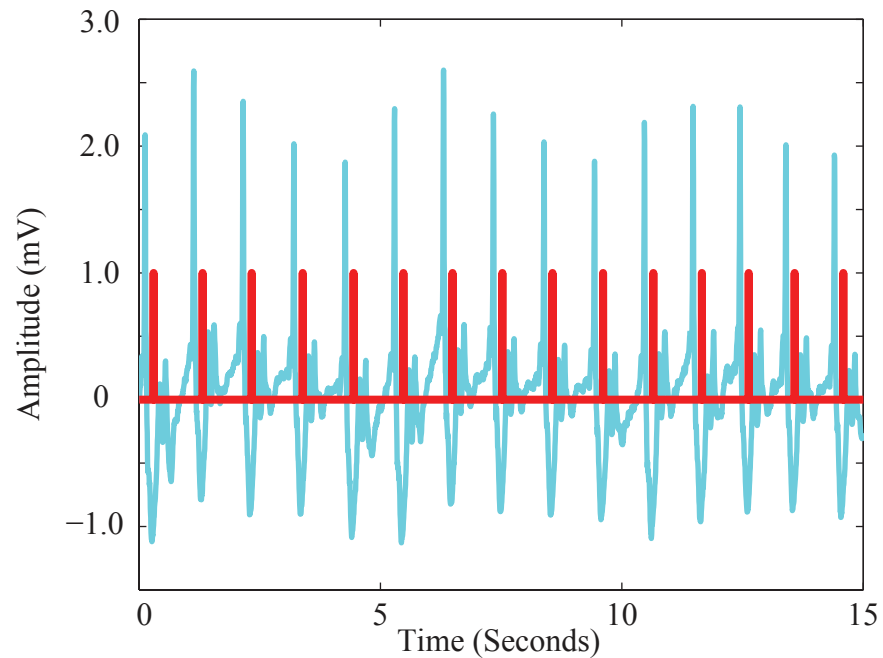

**(D)** Mean +/- SD of Time-Locked ECG (Visual Evoked Test)

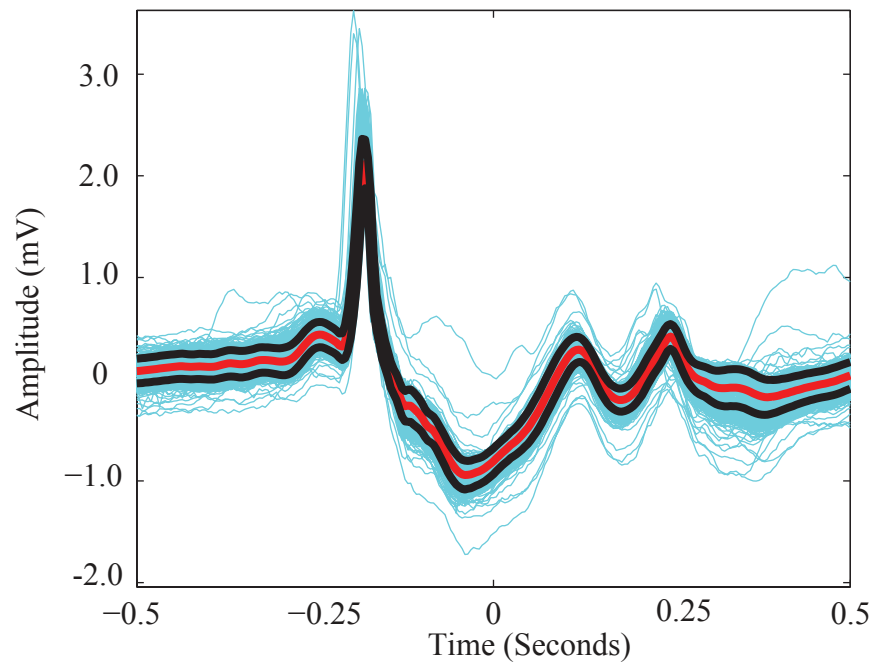

Supplement: NIHMS757639-supplement-1.pdf [file NIHMS757639-supplement-1.pdf]
