# Supplementary material
Source: PubMed Central journal article supplement (PMC4761527)

**(A)** Clean Motion Sensor Recording

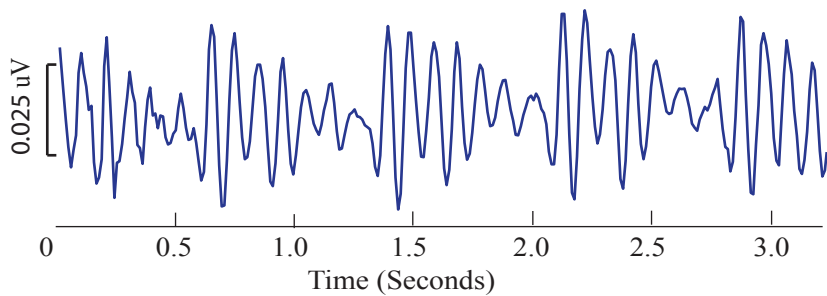

**(D)** Noisy Motion Sensor Recording

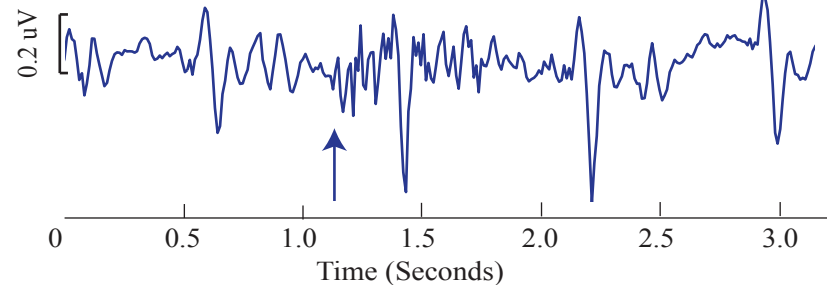

**(B)** Raw Recording vs. BCG Estimate  
(Motion-Based Adaptive Filter)

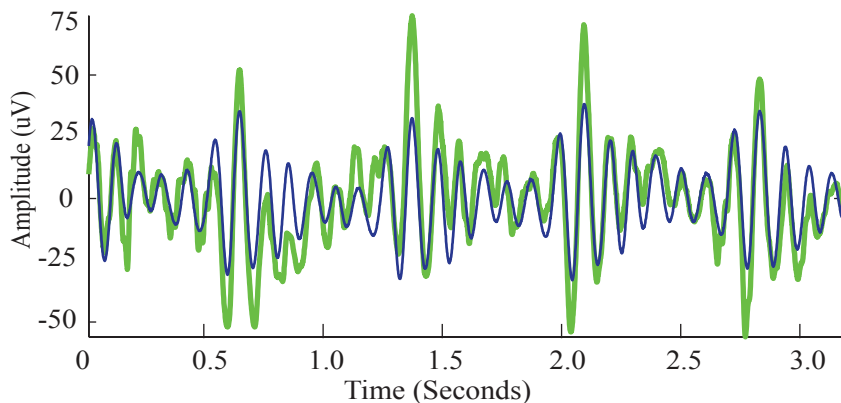

**(E)** Raw Recording vs. BCG Estimate  
(Motion-Based Adaptive Filter)

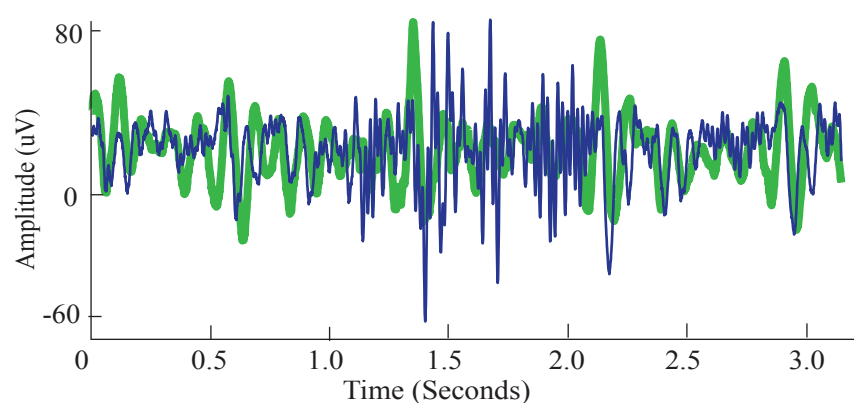

**(C)** Raw Recording vs. BCG Estimate  
(Harmonic Regression)

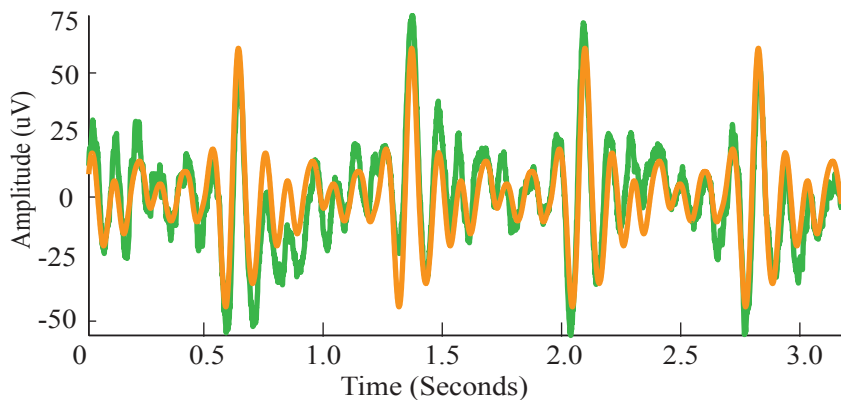

**(F)** Raw Recording vs. BCG Estimate  
(Harmonic Regression)

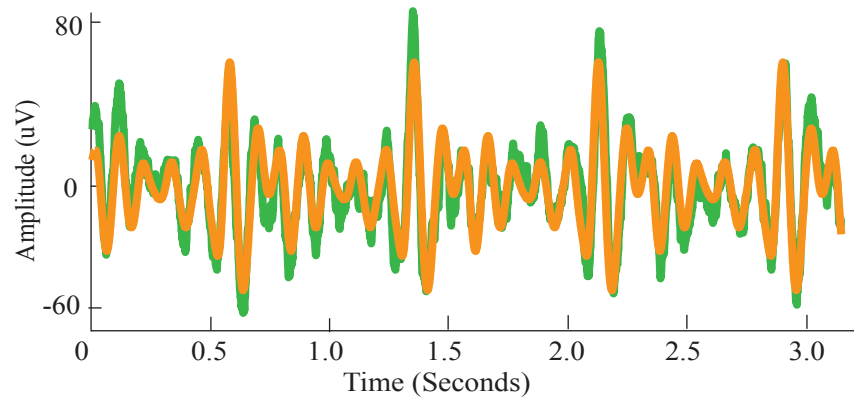

Supplement: NIHMS757639-supplement-2.pdf [file NIHMS757639-supplement-2.pdf]
